# Supplementary material for: Parentage testing and looking for single nucleotide markers associated with antler quality in deer (Cervus elaphus)
Source: Copernicus journal article supplement (doi:10.5194/aab-65-267-2022), 2022-07-28
Supplement: Supplementary file 1 [file aab-65-267-2022-supplement.zip]

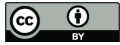

*Supplement of*

## **Parentage testing and looking for single nucleotide markers associated with antler quality in deer (*Cervus elaphus*)**

**Edith Elblinger et al.**

*Correspondence to:* Attila Zsolnai (attila.zsolnai@gmail.com)

- aab-65-267-2022-supplement-title-page.pdf
- SupplementaryTables\_sequences\_genes.xlsx

The copyright of individual parts of the supplement might differ from the article licence.
